# Supplementary material for: Diaminoterephthalate–α-lipoic acid conjugates with fluorinated residues
Source: publisher site journal article supplement (doi:10.3762/bjoc.15.96), 2019-04-26

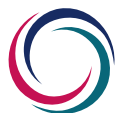

## Supporting Information

for

### **Diaminoterephthalate– $\alpha$ -lipoic acid conjugates with fluorinated residues**

Leon Buschbeck, Aleksandra Markovic, Gunther Wittstock and Jens Christoffers

*Beilstein J. Org. Chem.* **2019**, *15*, 981–991. doi:10.3762/bjoc.15.96

### **Copies of NMR spectra of all reported compounds**

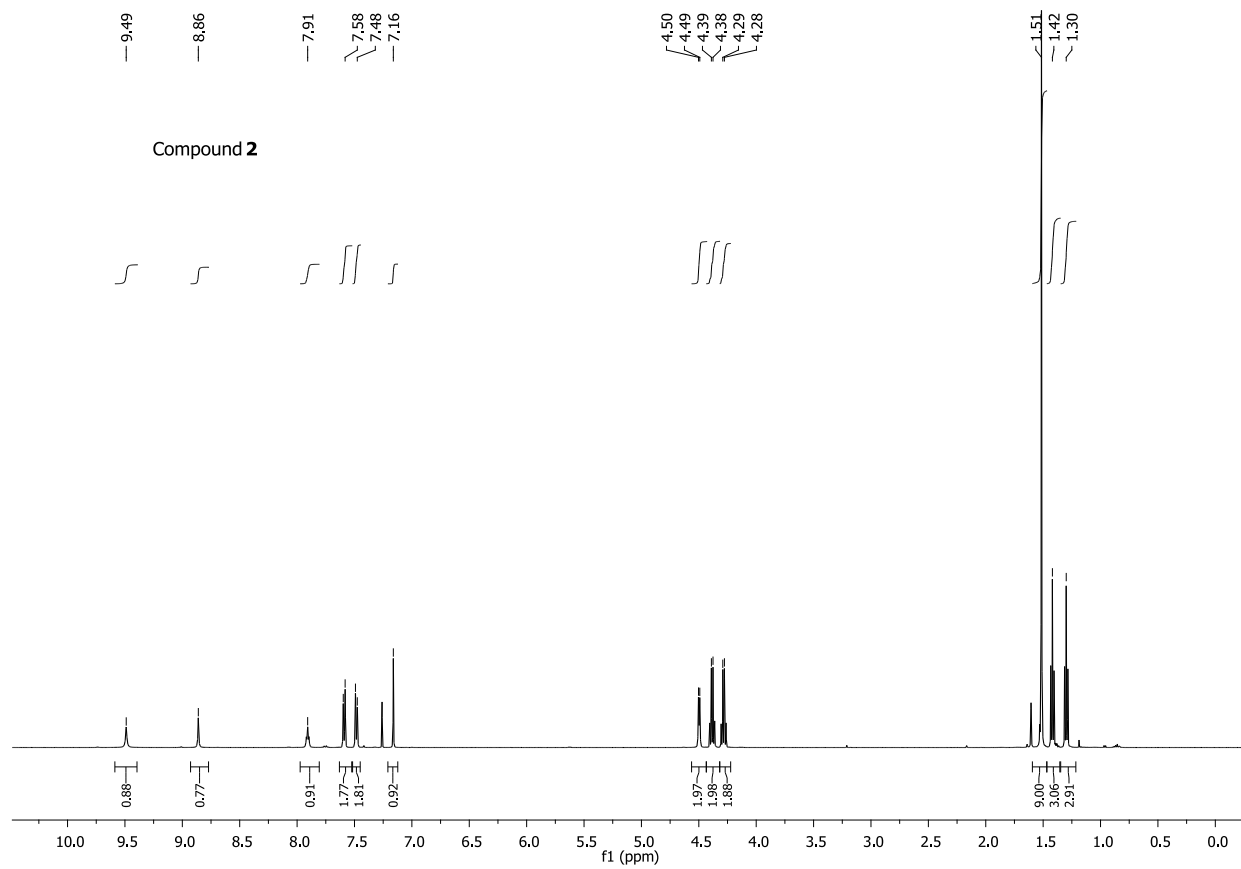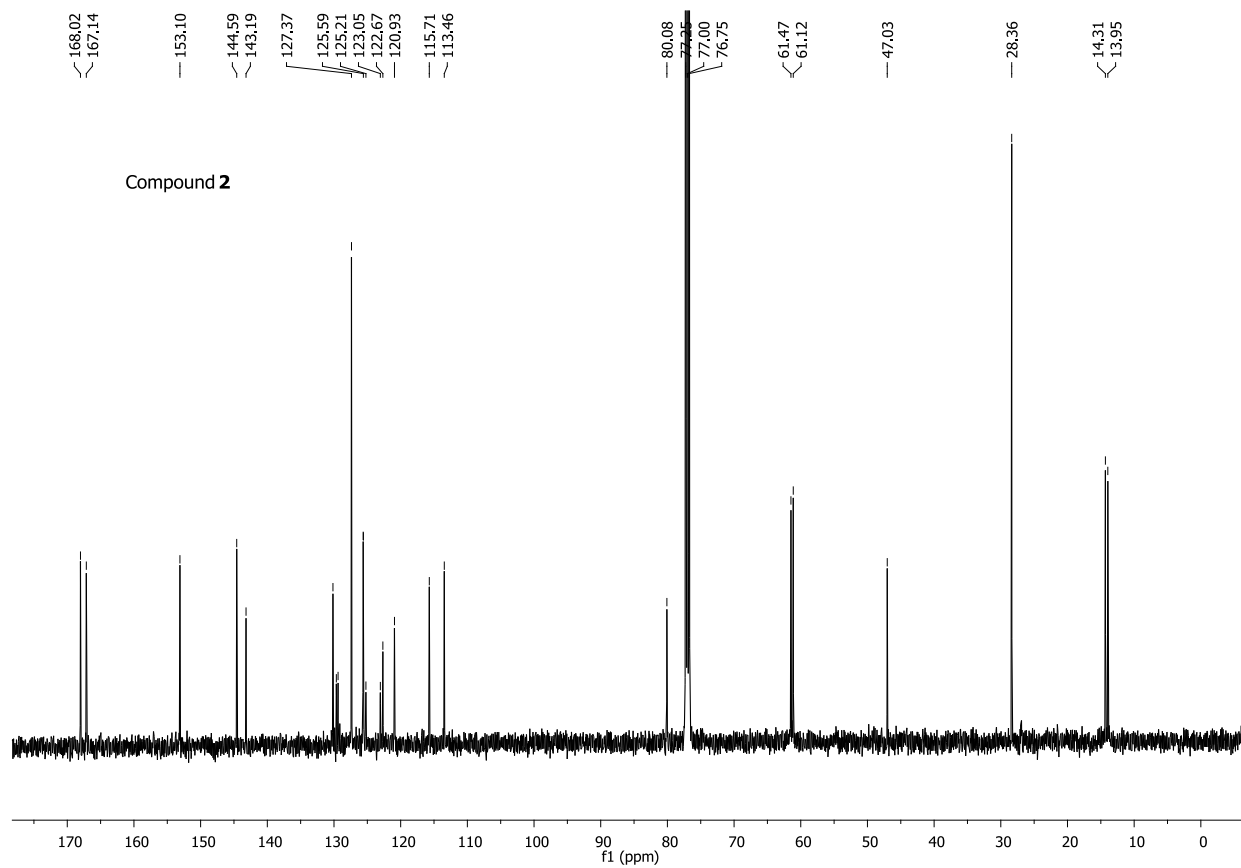

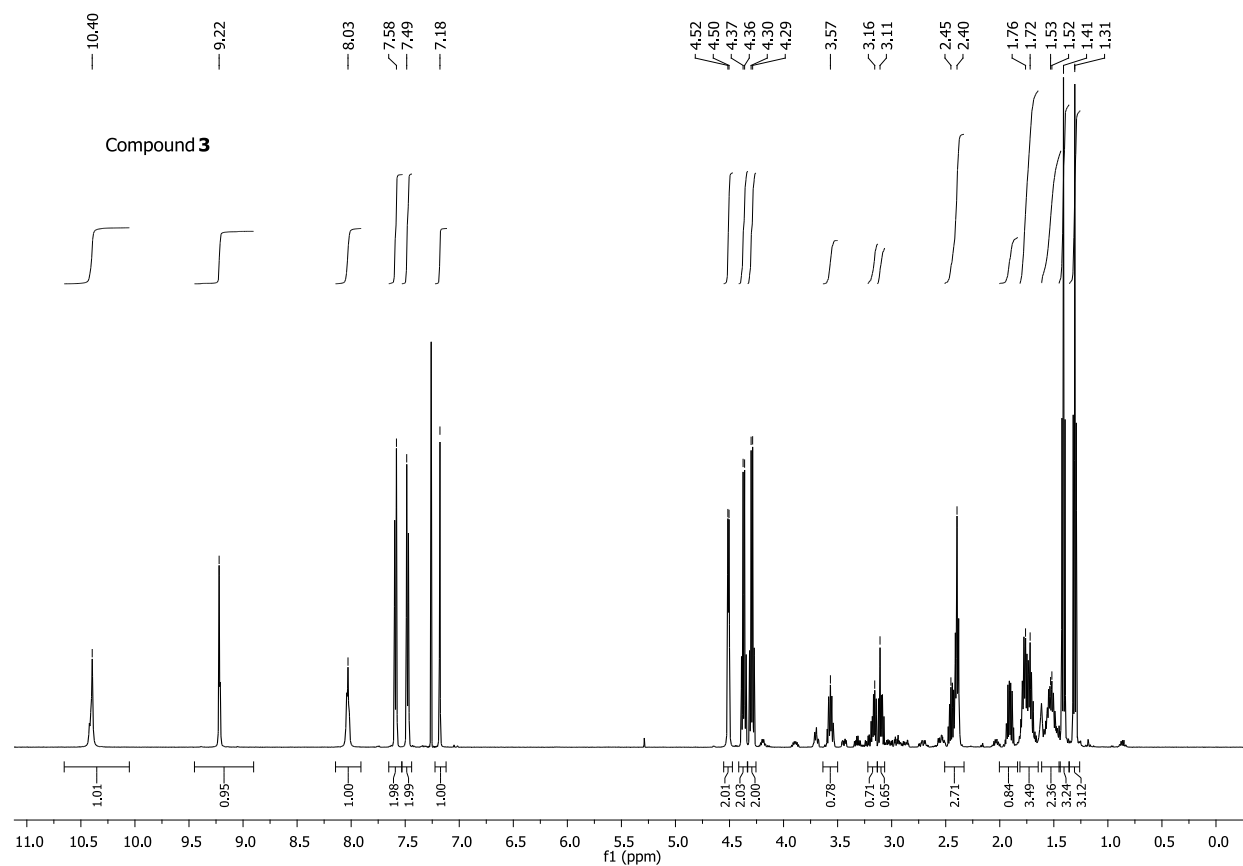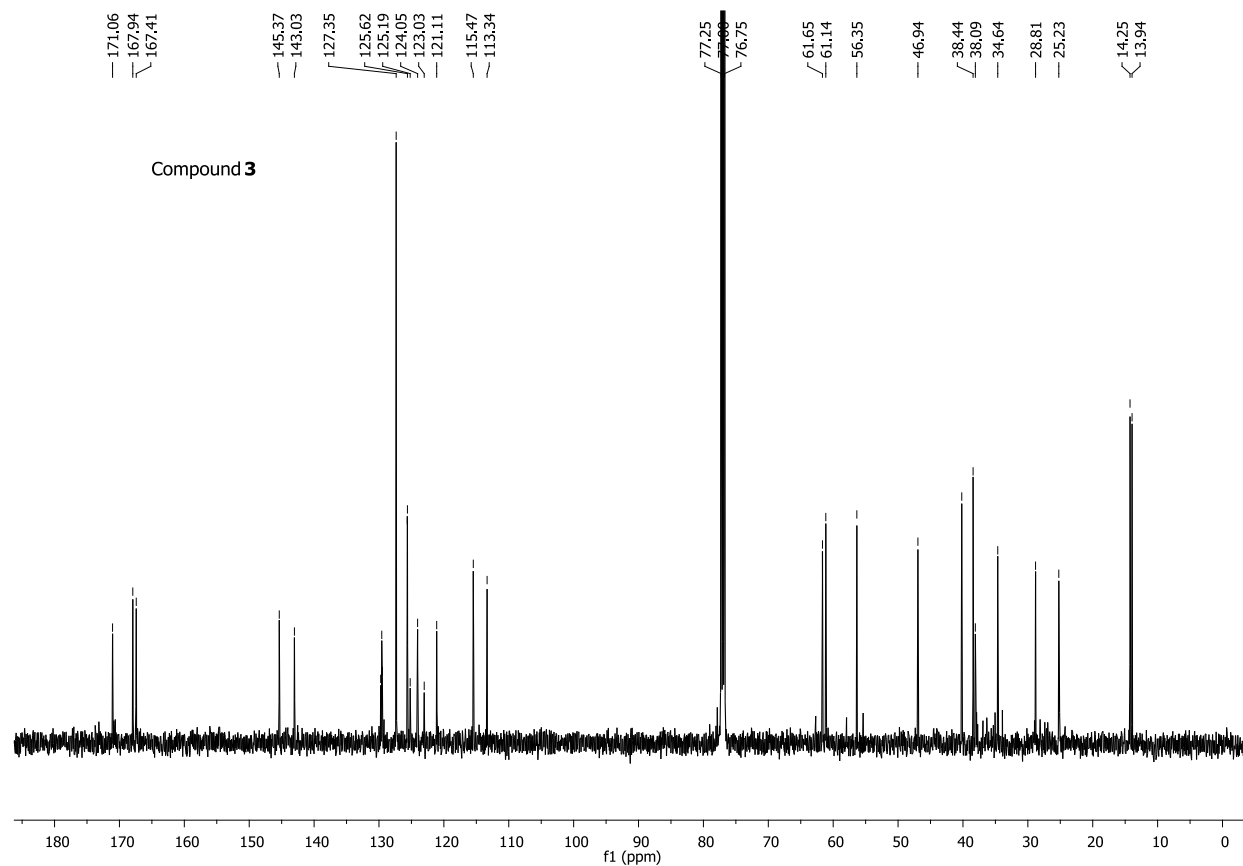

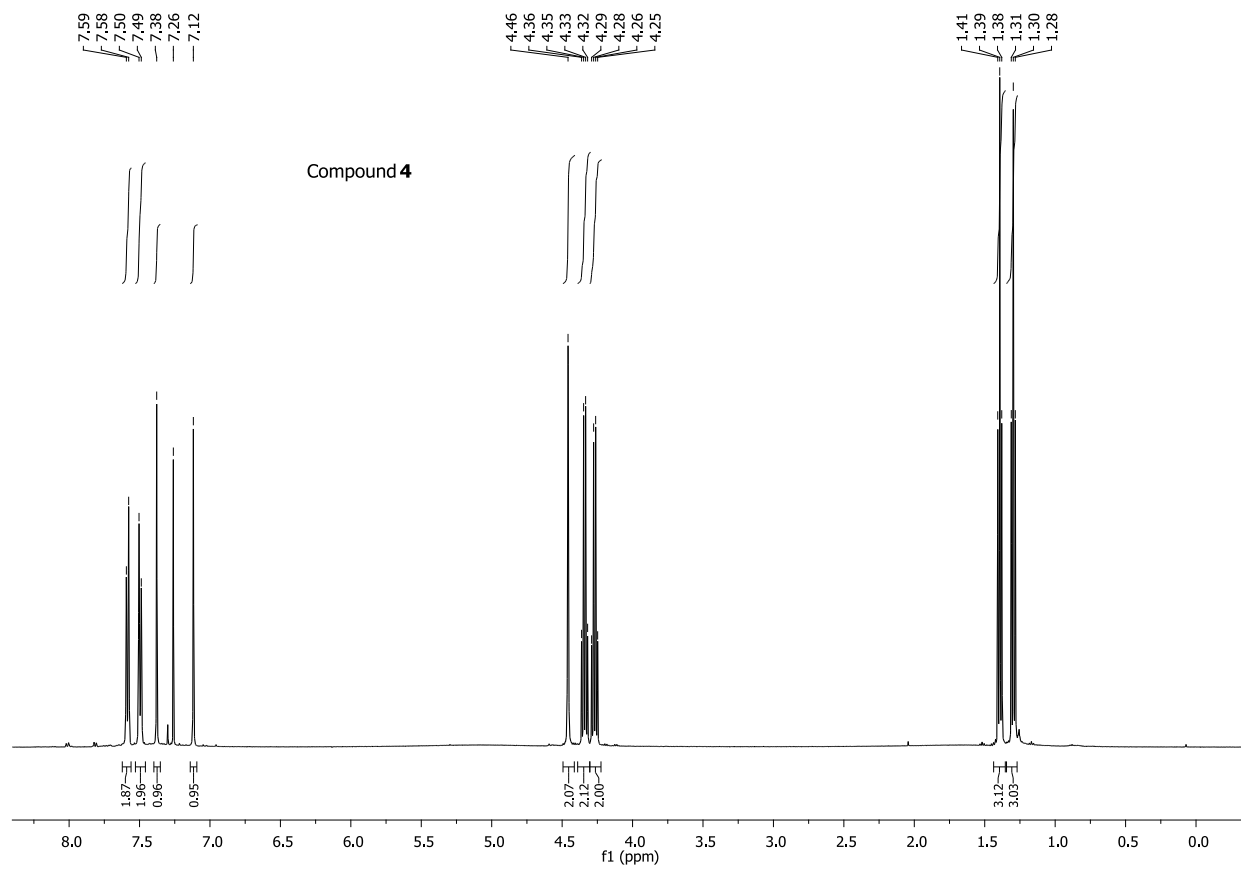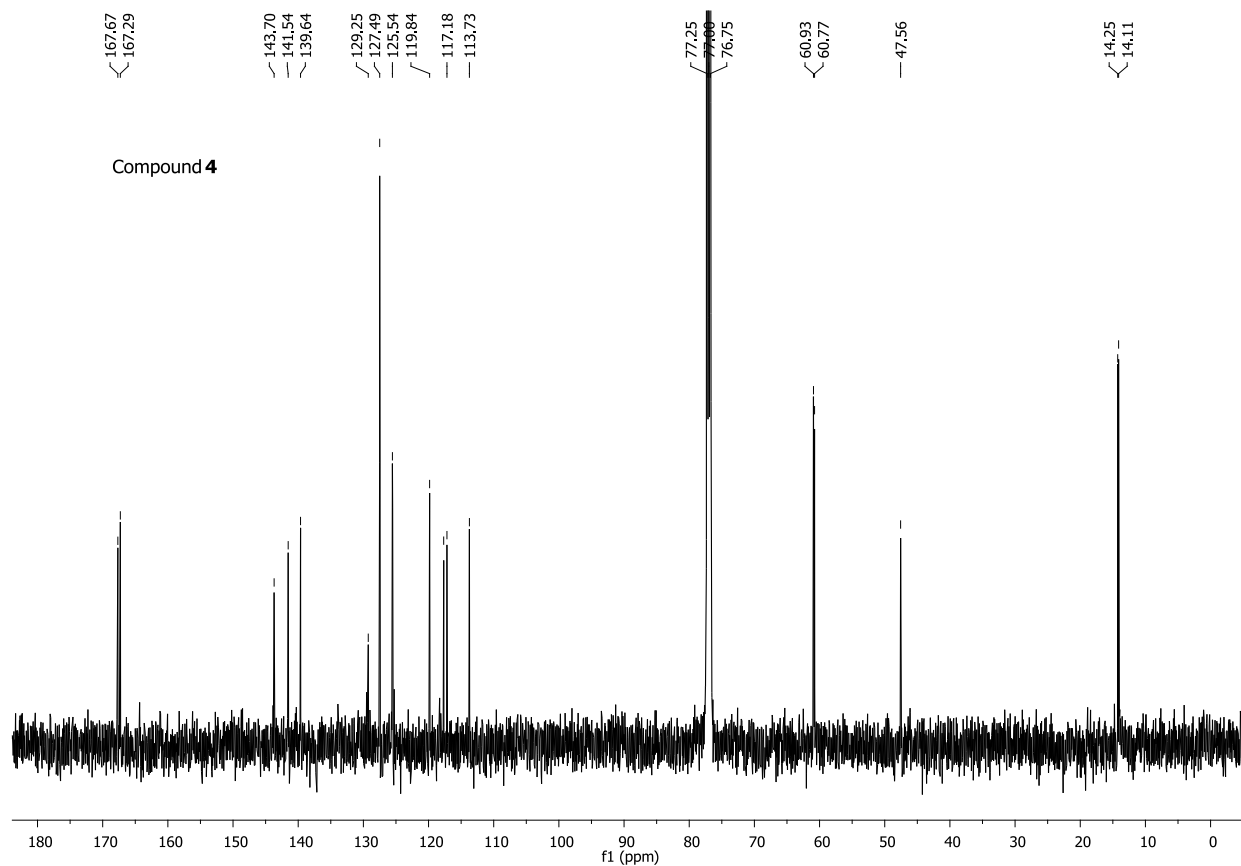

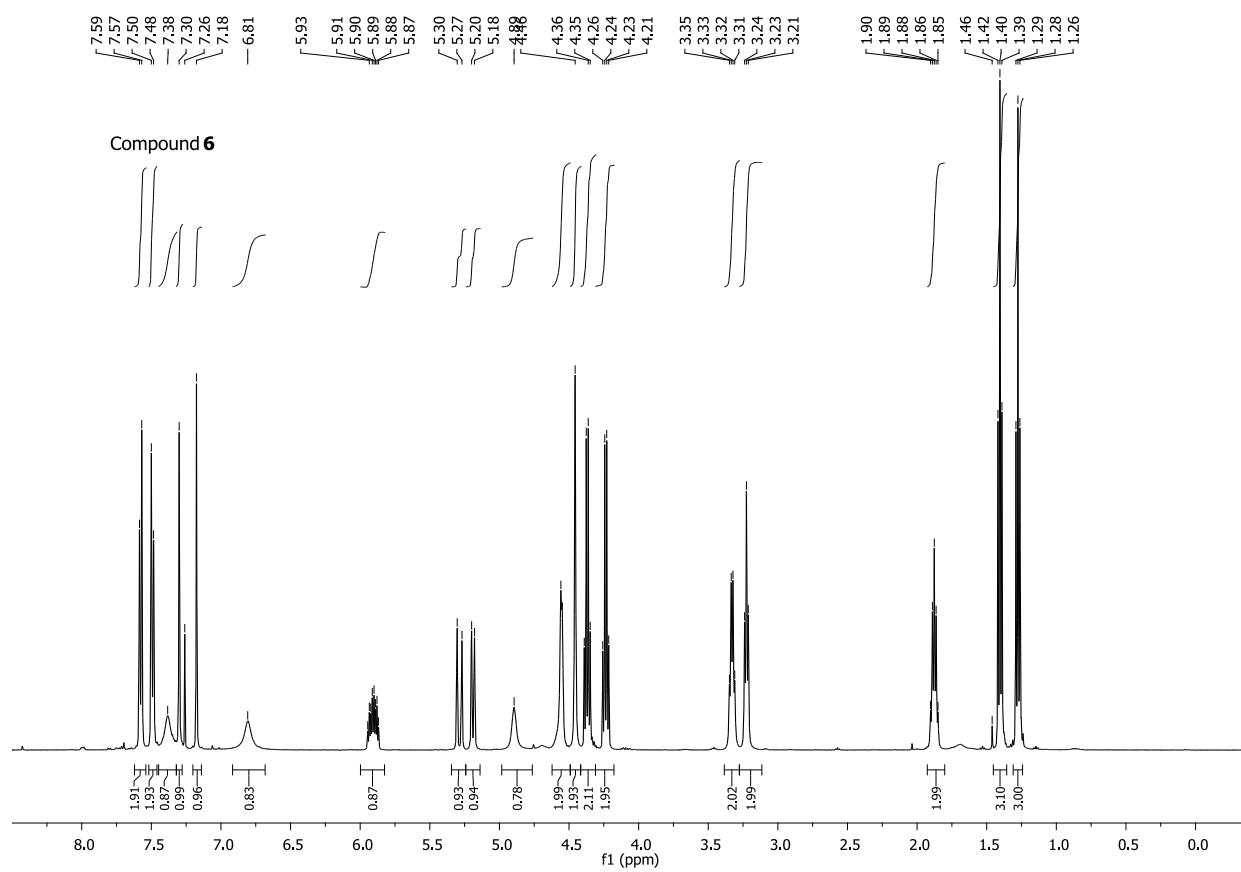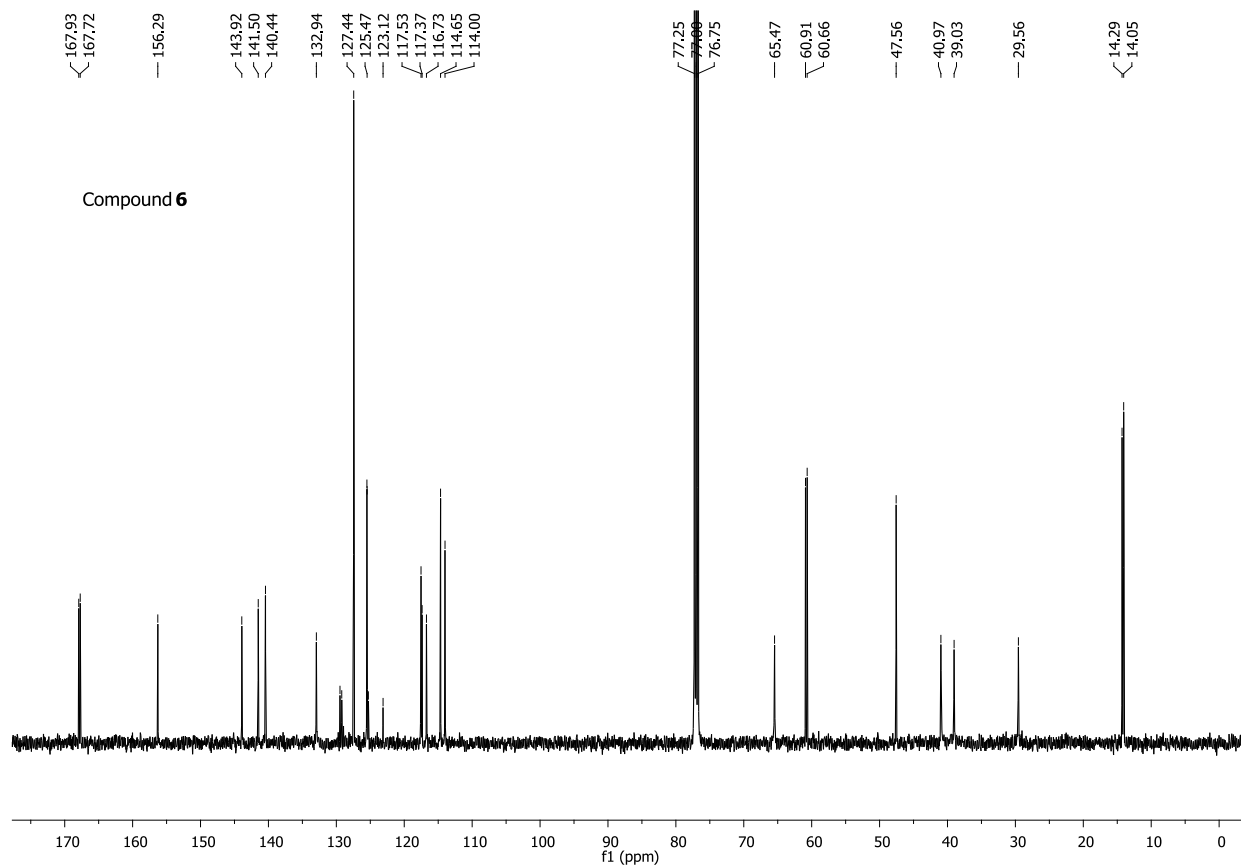

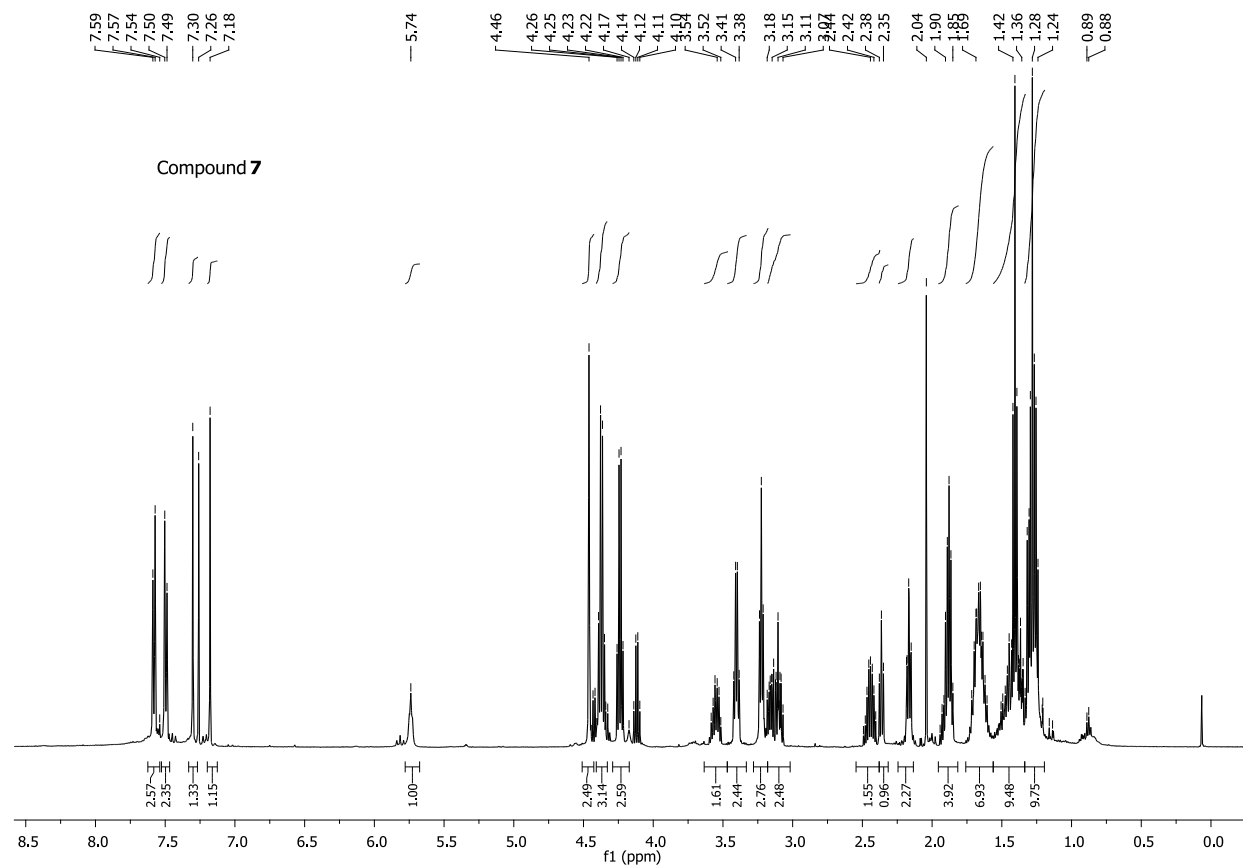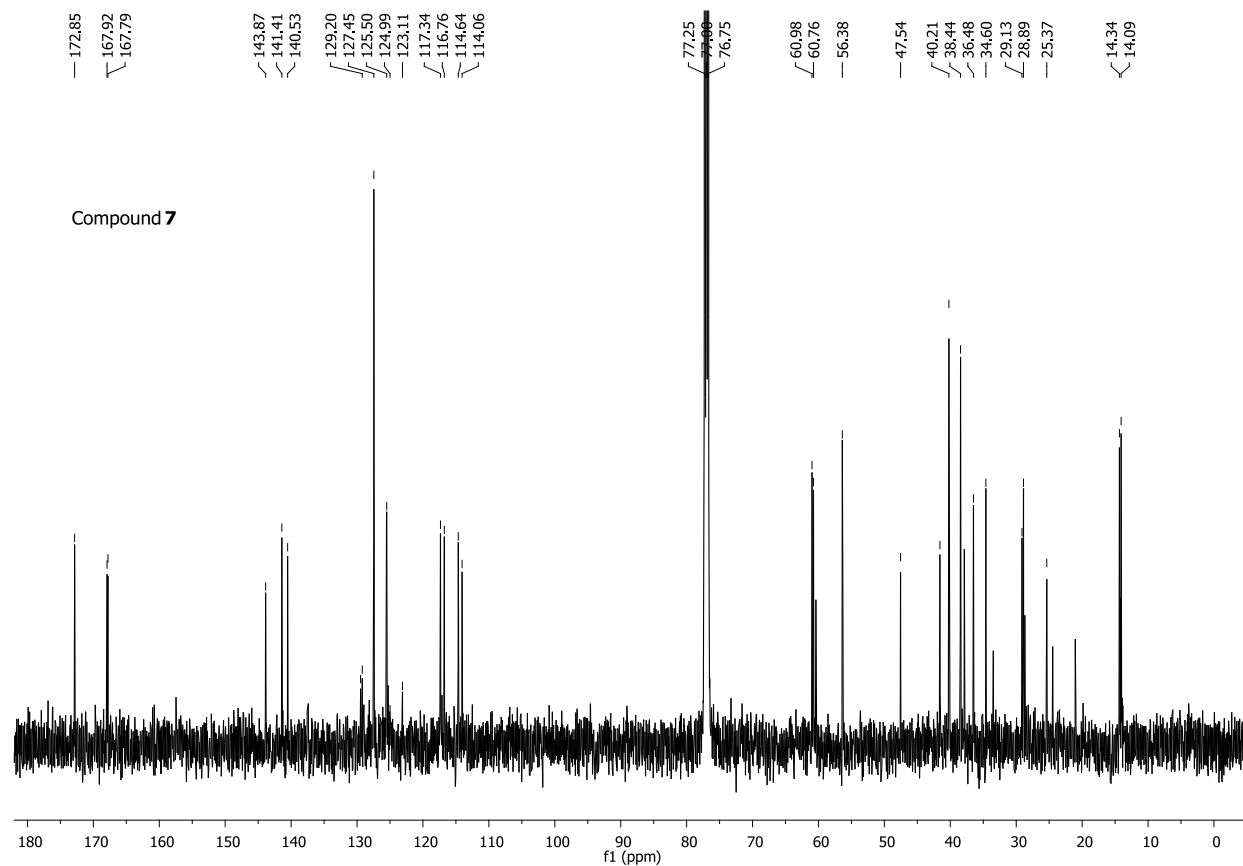

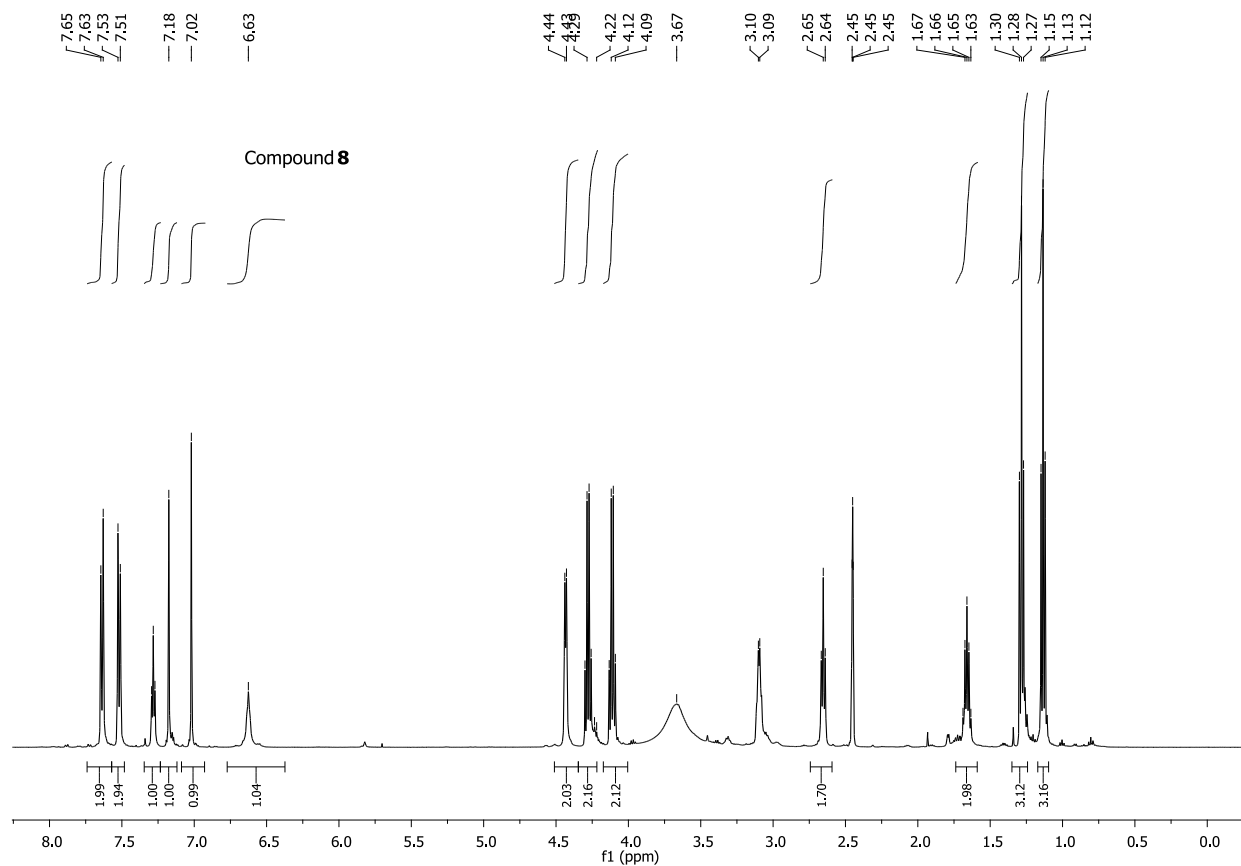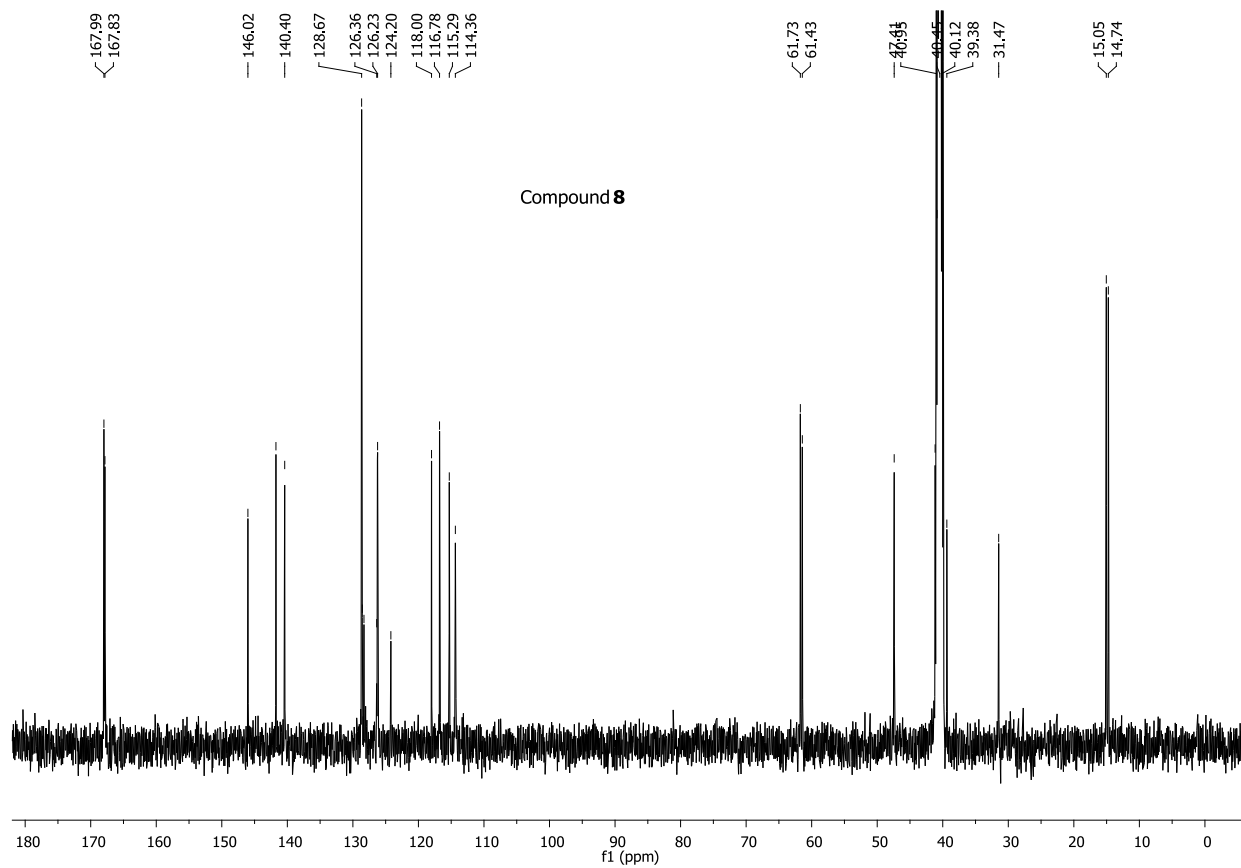

Supplement: Additional file 1 [file 1860-5397-15-96-S1.pdf]
